# Supplementary material for: Vitamin D deficiency is associated with mortality in the medical intensive care unit
Source: Springer Nature journal article supplement (doi:10.1186/cc10585), 2011-12-10

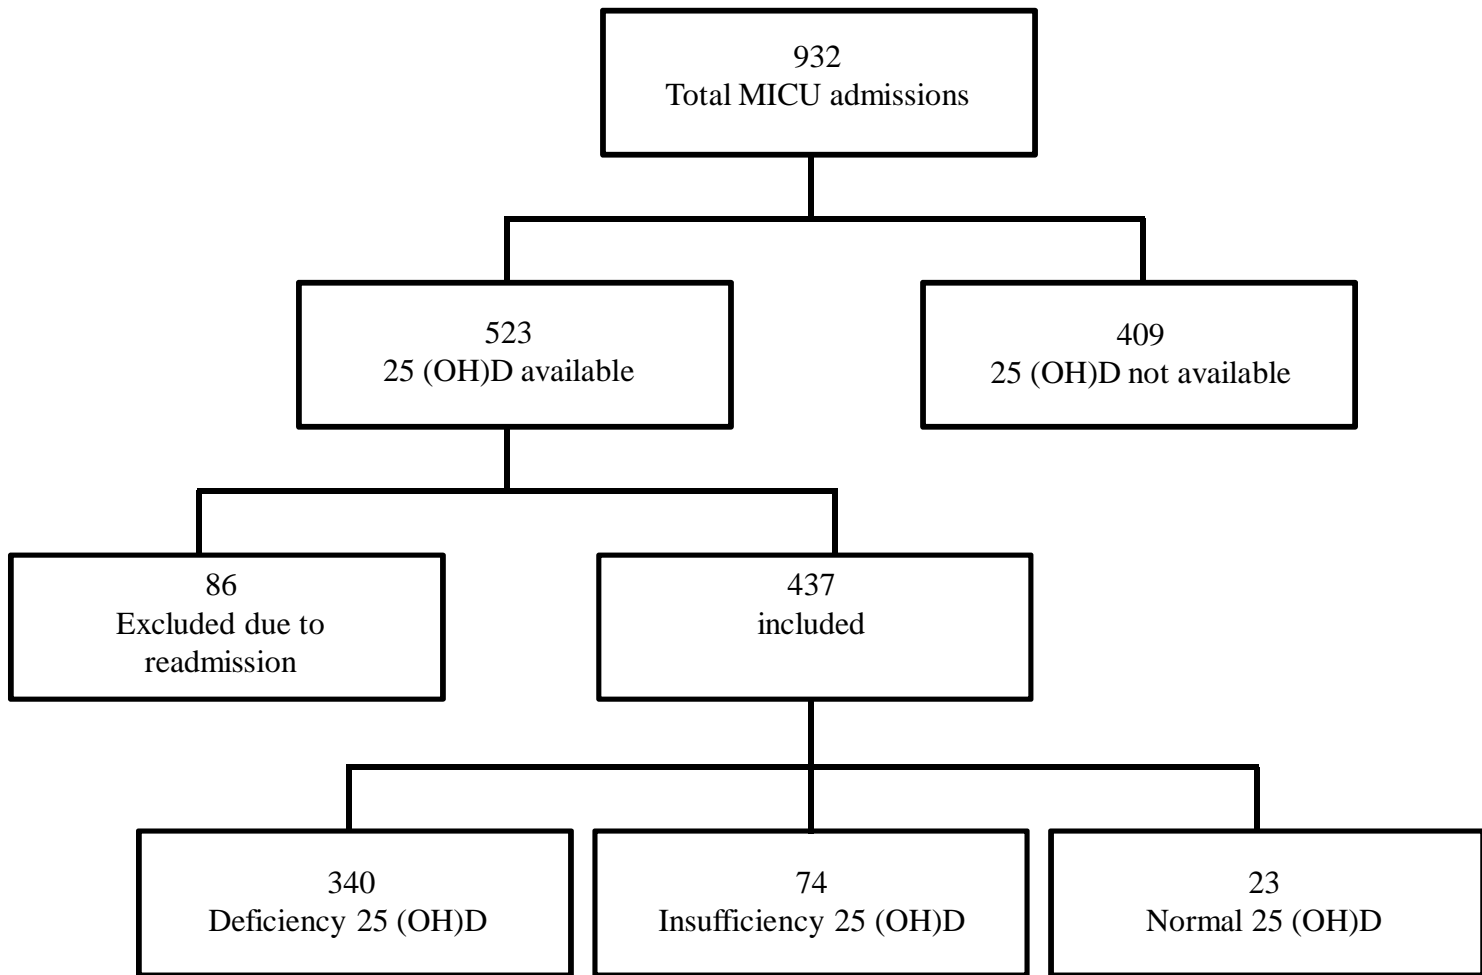

Supplement: 13054_2011_9838_MOESM1_ESM.pdf [file 13054_2011_9838_MOESM1_ESM.pdf]
