# Supplementary material for: Vitamin D deficiency is associated with mortality in the medical intensive care unit
Source: Springer Nature journal article supplement (doi:10.1186/cc10585), 2011-12-10
Supplement: 13054_2011_9838_MOESM4_ESM.pdf [file 13054_2011_9838_MOESM4_ESM.pdf]

Comparison of patients with available 25-hydroxyvitamin D levels versus patients without 25-hydroxyvitamin D levels .

| Variable               | 25(OH)D<br>Levels available<br><br>N=437 | 25(OH)D<br>Levels not available<br><br>N=409 | <i>p</i>                 |
|------------------------|------------------------------------------|----------------------------------------------|--------------------------|
| Age                    | 56.6 ± 17.1                              | 55.7 ± 15.9                                  | 0.41<br>95% CI 1.31-3.15 |
| Gender – Male (%)      | 208 (47.5 %)                             | 201 (49.1%)                                  | 0.67                     |
| APACHE IV              | 67.0 ± 27.5                              | 63.6 ± 28.4                                  | 0.07<br>95% CI 0.40-7.14 |
| Ventilator requirement | 153 (35%)                                | 119(29%)                                     | 0.07                     |
| Mortality              | 92 (21%)                                 | 65(16%)                                      | 0.006                    |

APACHE IV: acute physiology and chronic health evaluation; 25(OH)D: 25-hydroxyvitamin D
